# Supplementary material
Source: Springer Nature journal article supplement (https://www.springermedizin.de/resource/supplementary/12888_2010_713_MOESM1_ESM.pdf/9478252)
Supplement: MOESM1 [file 9478252]

**Age 65 years or older**

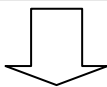

**Presence of a mental disorder  
(excluding moderate to severe  
cognitive disorder)**

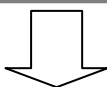

**Lack of motivation for  
treatment**

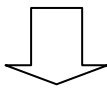

**Suspected problems in  
minimal four of the following  
domains: addiction/ daily  
activities/ somatic problems/  
personal relationships/ daily  
living activities/ finance/  
housing/ police contacts**

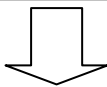

**Inclusion**

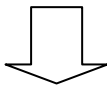

**Randomization**
